# Supplementary material for: Novel Star-Shaped Viologens Containing Phenyl and Triphenylamine Moieties for Electrochromic Applications
Source: MDPI journal article supplement (doi:10.3390/molecules29092006), 2024-04-26
Supplement: s1 [file s1]

## **SUPPLEMENTARY INFORMATION**

### **Novel star-shaped viologens containing phenyl and triphenylamine moieties for electrochromic applications**

Radosław Banasz<sup>1</sup> and Monika Wałęsa-Chorab<sup>1,\*</sup>

*<sup>1</sup>Faculty of Chemistry, Adam Mickiewicz University in Poznań, Uniwersytetu Poznańskiego 8,  
61-614 Poznań, Poland*

## Table of content

|                                                                                                                                                                                                                |    |
|----------------------------------------------------------------------------------------------------------------------------------------------------------------------------------------------------------------|----|
| Table S1. Solubility of <b>1</b> and <b>2</b> in different organic solvents .....                                                                                                                              | 2  |
| Figure S1. <sup>1</sup> H NMR spectra of compound (TPA)Br <sub>3</sub> in CDCl <sub>3</sub> .....                                                                                                              | 3  |
| Figure S2. <sup>13</sup> C NMR spectra of compound (TPA)Br <sub>3</sub> in CDCl <sub>3</sub> .....                                                                                                             | 3  |
| Figure S3. <sup>1</sup> H NMR spectra of compound A in CDCl <sub>3</sub> .....                                                                                                                                 | 4  |
| Figure S4. <sup>13</sup> C NMR spectra of compound A in CDCl <sub>3</sub> .....                                                                                                                                | 4  |
| Figure S5. <sup>1</sup> H NMR spectra of compound B in CDCl <sub>3</sub> .....                                                                                                                                 | 5  |
| Figure S6. <sup>13</sup> C NMR spectra of compound B in CDCl <sub>3</sub> .....                                                                                                                                | 5  |
| Figure S7. <sup>1</sup> H NMR spectra of compound <b>1</b> in d <sub>6</sub> -DMSO.....                                                                                                                        | 6  |
| Figure S8. <sup>13</sup> C NMR spectra of compound <b>1</b> in d <sub>6</sub> -DMSO.....                                                                                                                       | 6  |
| Figure S9. <sup>1</sup> H NMR spectra of compound <b>2</b> in d <sub>6</sub> -DMSO.....                                                                                                                        | 7  |
| Figure S10. <sup>13</sup> C NMR spectra of compound <b>2</b> in d <sub>6</sub> -DMSO.....                                                                                                                      | 7  |
| Figure S11. HR-ESI-MS spectra of compound (TPA)Br <sub>3</sub> .....                                                                                                                                           | 8  |
| Figure S12. HR-ESI-MS spectra of compound A .....                                                                                                                                                              | 8  |
| Figure S13. HR-ESI-MS spectra of compound B .....                                                                                                                                                              | 9  |
| Figure S14. HR-ESI-MS spectra of compound <b>1</b> .....                                                                                                                                                       | 9  |
| Figure S15. HR-ESI-MS spectra of compound <b>2</b> .....                                                                                                                                                       | 10 |
| Figure S16. Normalized spectra of <b>2</b> in solvents of different polarities: ethyl acetate (▲ green), tetrahydrofuran (▼ red), dichloromethane (◆ yellow), methanol (● orange), acetonitrile (■ black)..... | 10 |

Table S1. Solubility of **1** and **2** in different organic solvents

| Solvent         | <b>1</b> PF <sub>6</sub> <sup>-</sup> | <b>1</b> I <sup>-</sup> | <b>2</b> PF <sub>6</sub> <sup>-</sup> | <b>2</b> I <sup>-</sup> |  |
|-----------------|---------------------------------------|-------------------------|---------------------------------------|-------------------------|--|
| Ethyl acetate   | +                                     | -                       | +                                     | -                       |  |
| Tetrahydrofuran | +                                     | -                       | +                                     | -                       |  |
| Dichloromethane | +                                     | -                       | +                                     | -                       |  |
| Methanol        | +                                     | +                       | +                                     | +                       |  |
| Acetonitrile    | +                                     | +                       | +                                     | +                       |  |

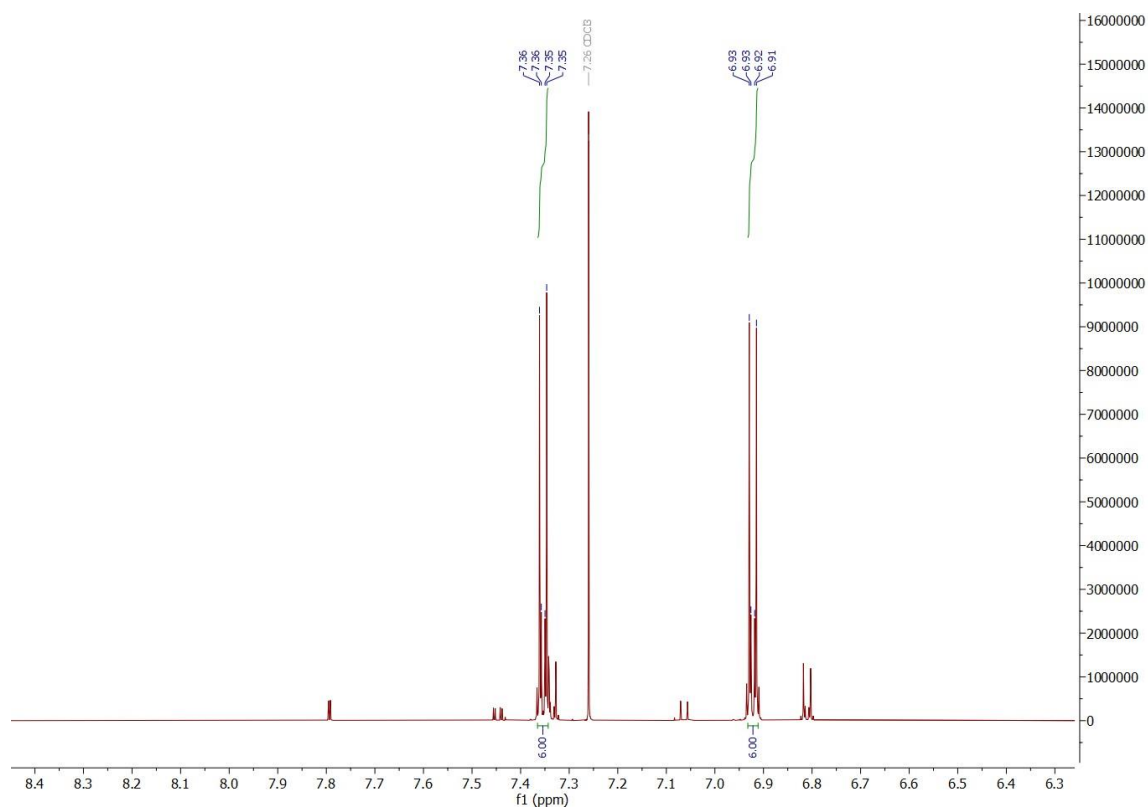

Figure S1.  $^1\text{H}$  NMR spectra of compound  $(\text{TPA})\text{Br}_3$  in  $\text{CDCl}_3$

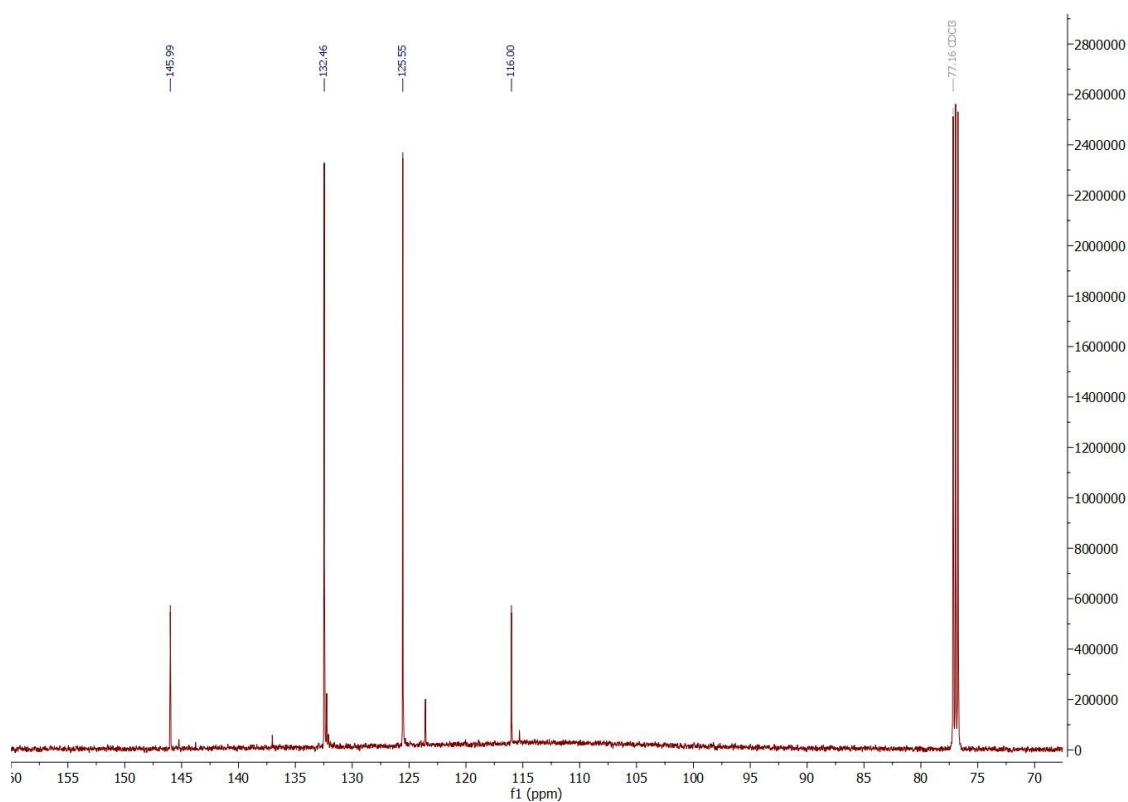

Figure S2.  $^{13}\text{C}$  NMR spectra of compound  $(\text{TPA})\text{Br}_3$  in  $\text{CDCl}_3$

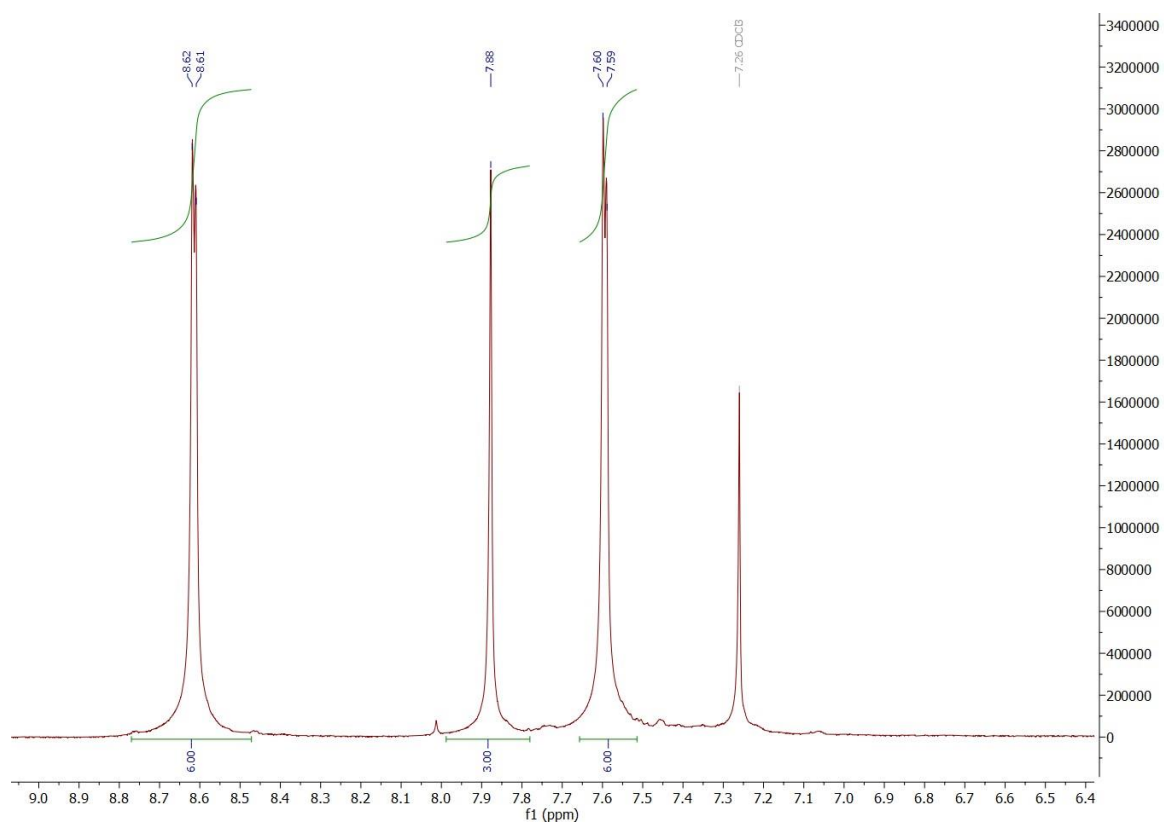

Figure S3. <sup>1</sup>H NMR spectra of compound A in CDCl<sub>3</sub>

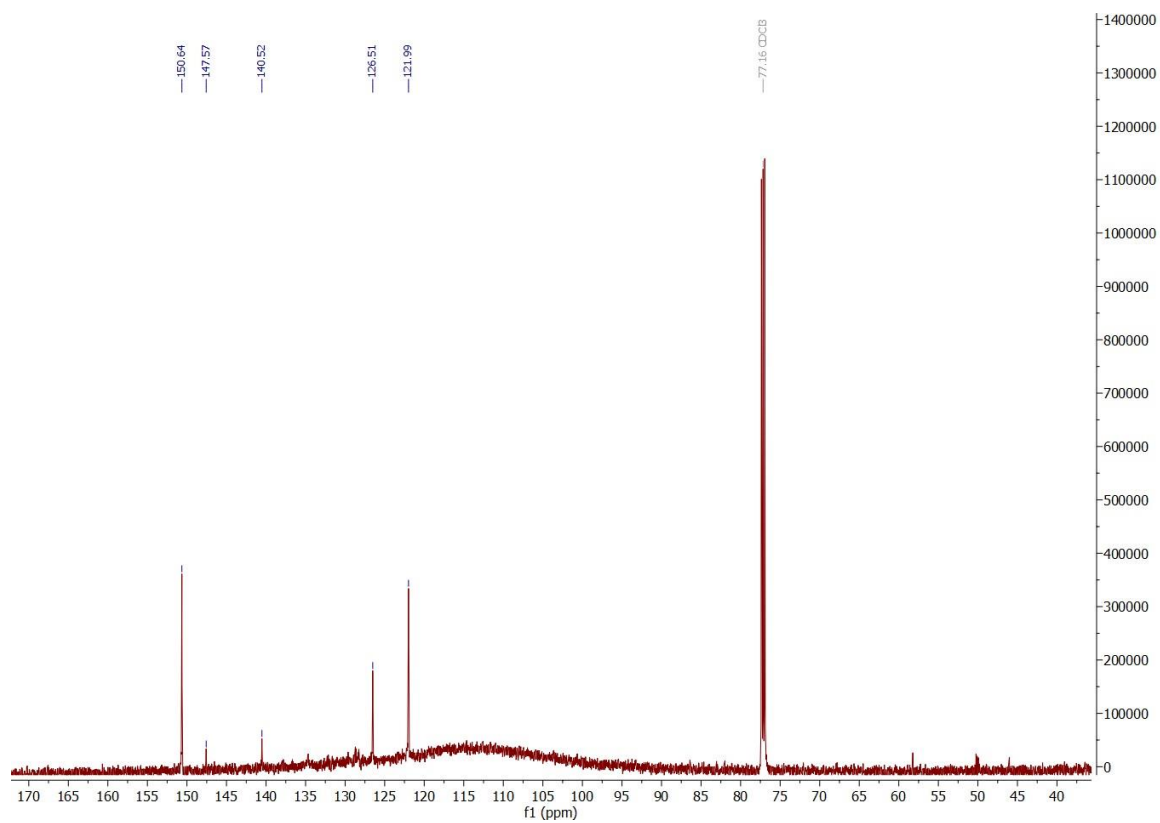

Figure S4. <sup>13</sup>C NMR spectra of compound A in CDCl<sub>3</sub>

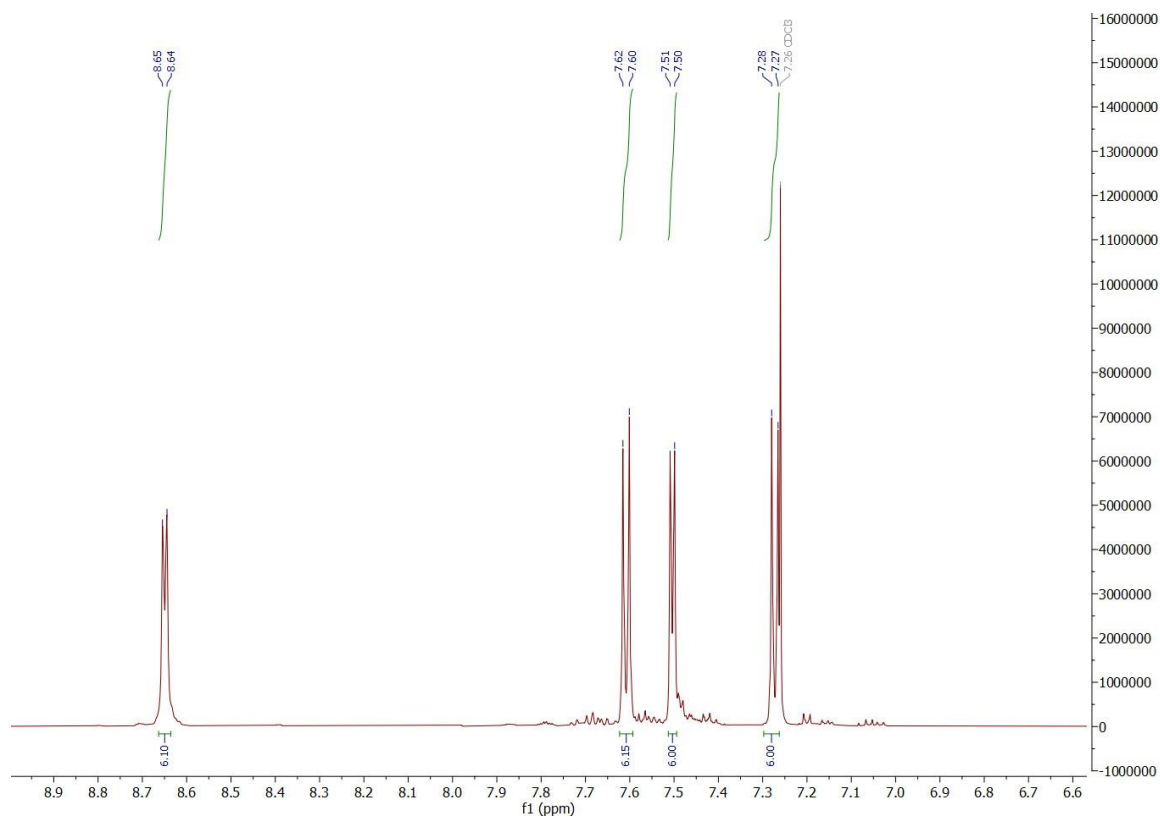

Figure S5. <sup>1</sup>H NMR spectra of compound **B** in CDCl<sub>3</sub>

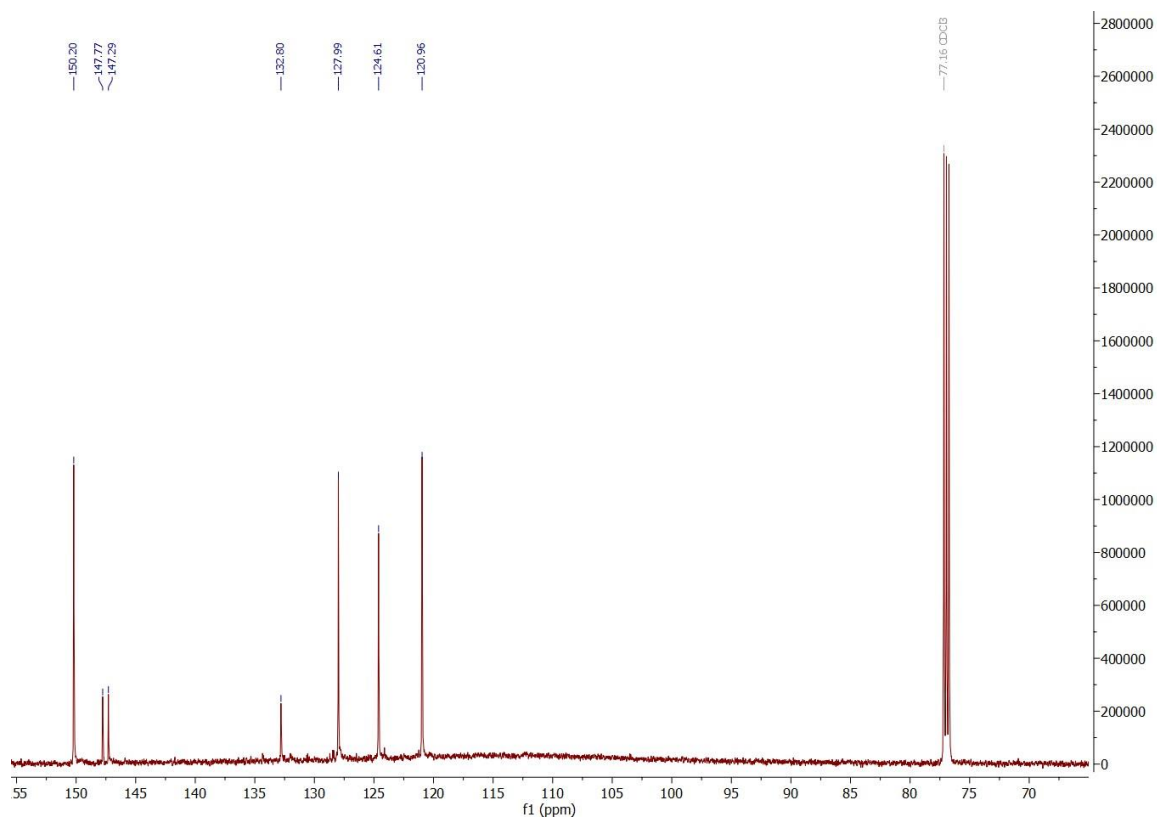

Figure S6. <sup>13</sup>C NMR spectra of compound **B** in CDCl<sub>3</sub>

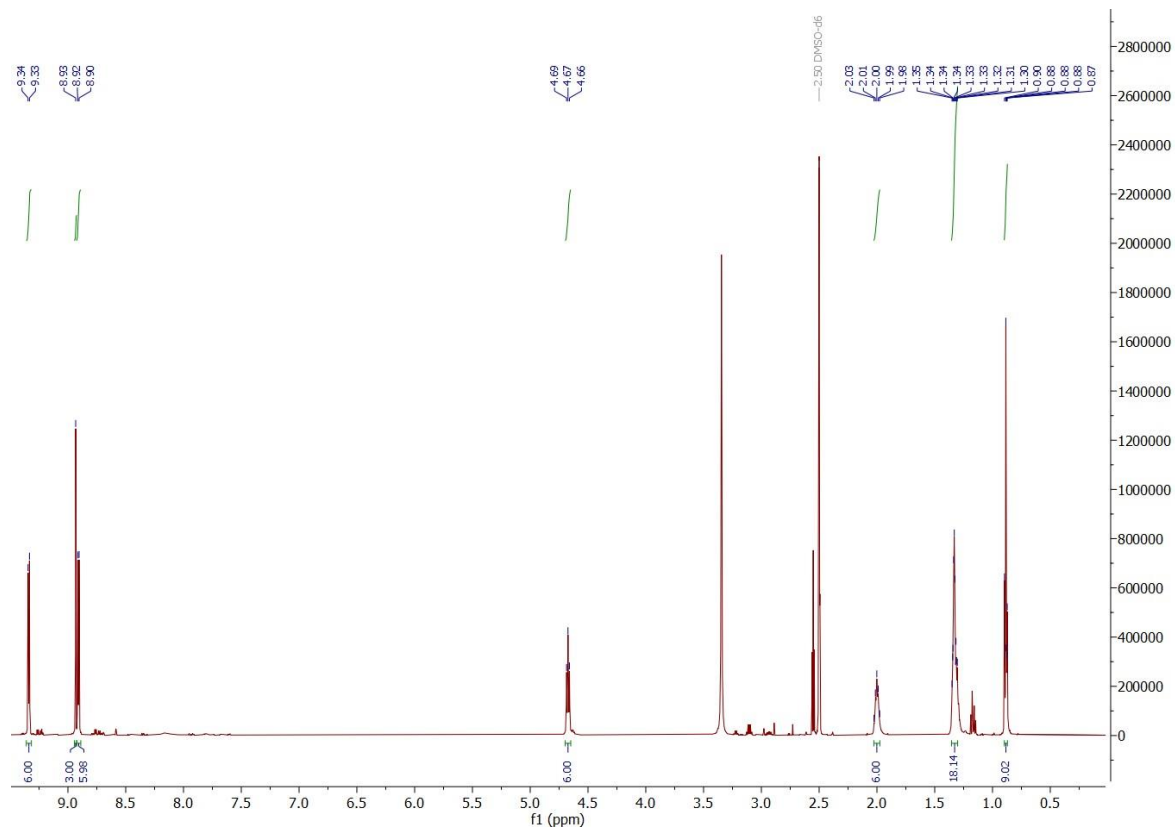

Figure S7. <sup>1</sup>H NMR spectra of compound **1** in d<sub>6</sub>-DMSO

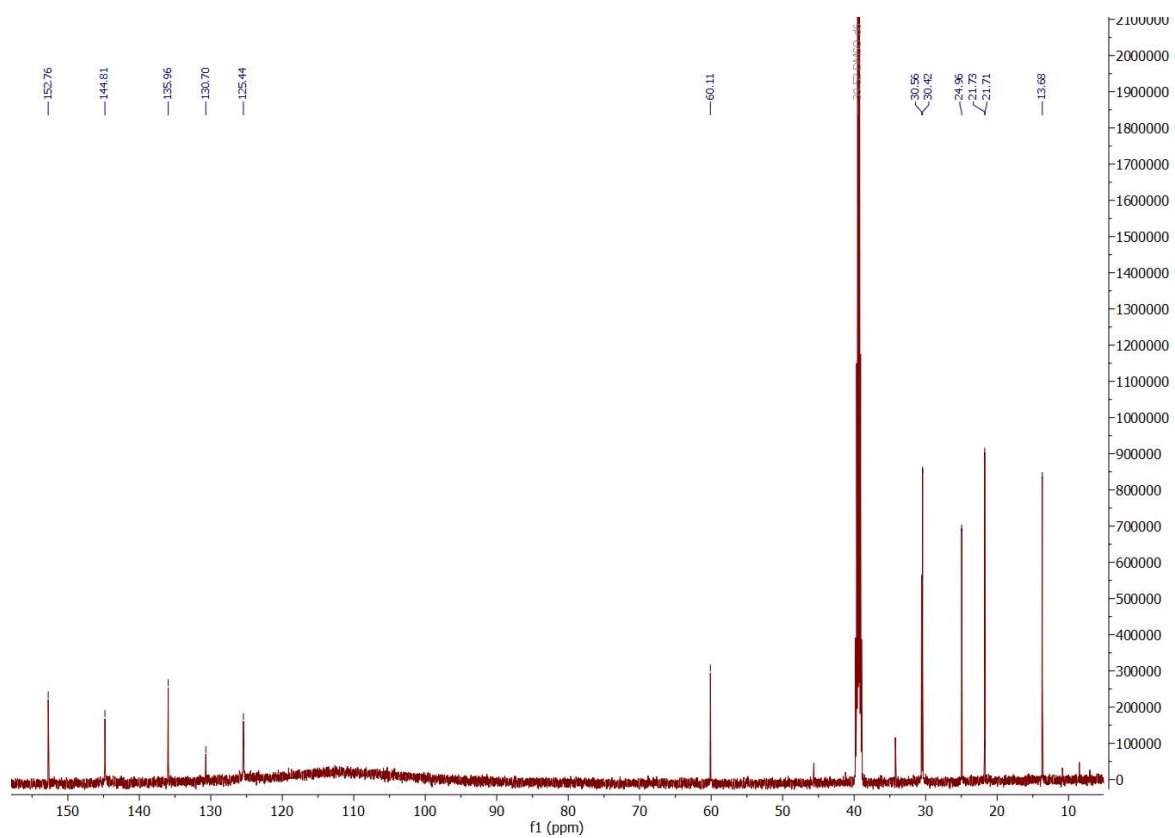

Figure S8. <sup>13</sup>C NMR spectra of compound **1** in d<sub>6</sub>-DMSO

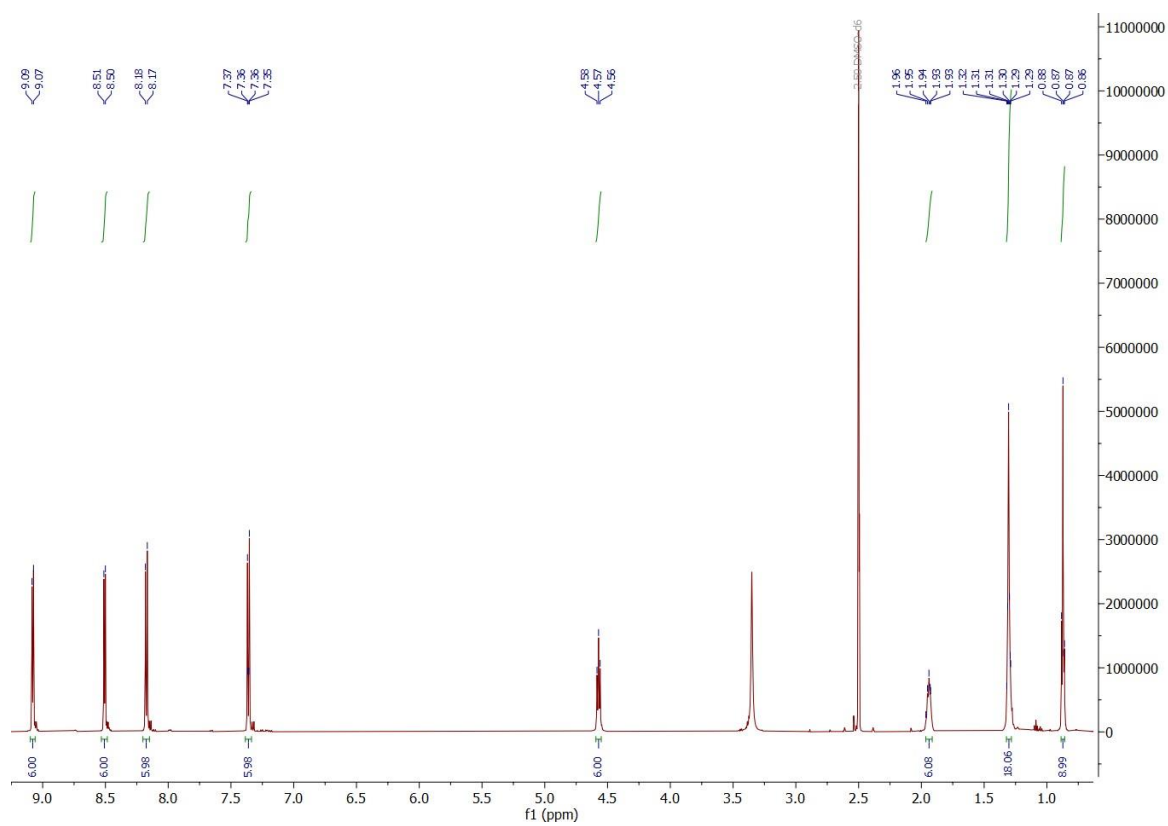

Figure S9. <sup>1</sup>H NMR spectra of compound **2** in d<sub>6</sub>-DMSO

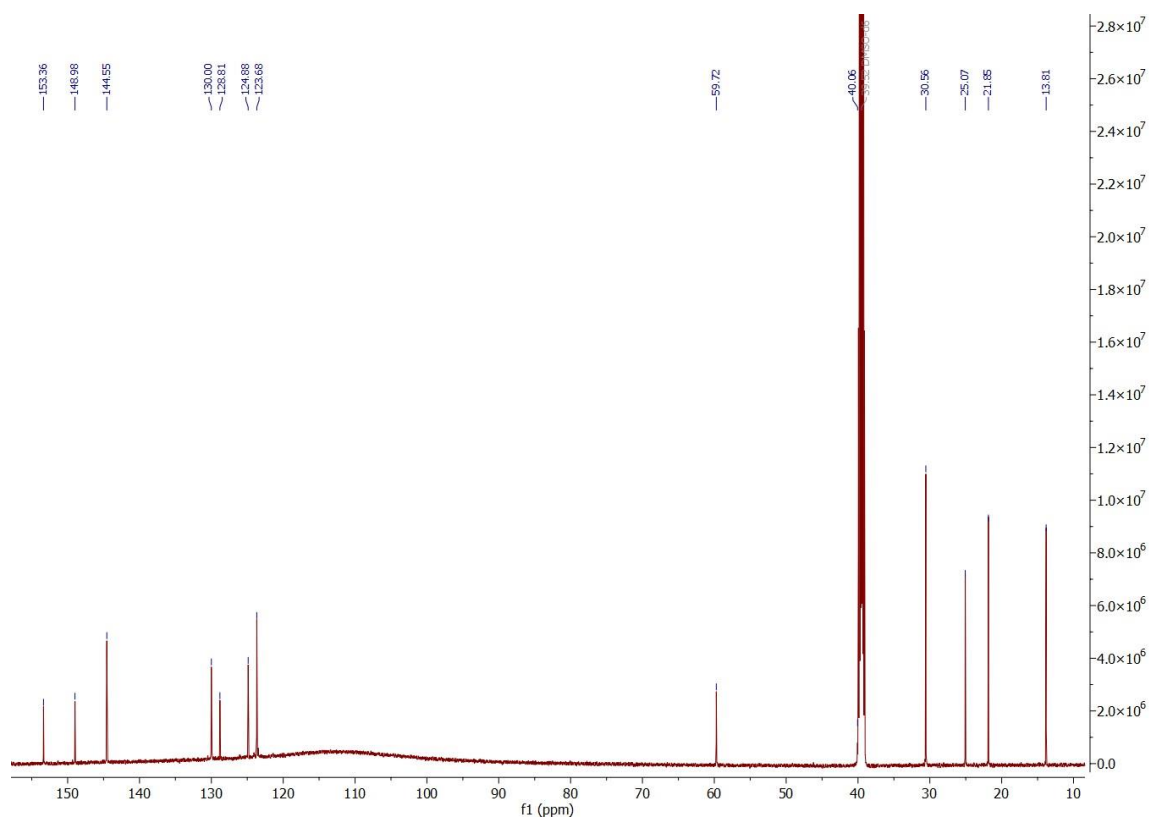

Figure S10. <sup>13</sup>C NMR spectra of compound **2** in d<sub>6</sub>-DMSO

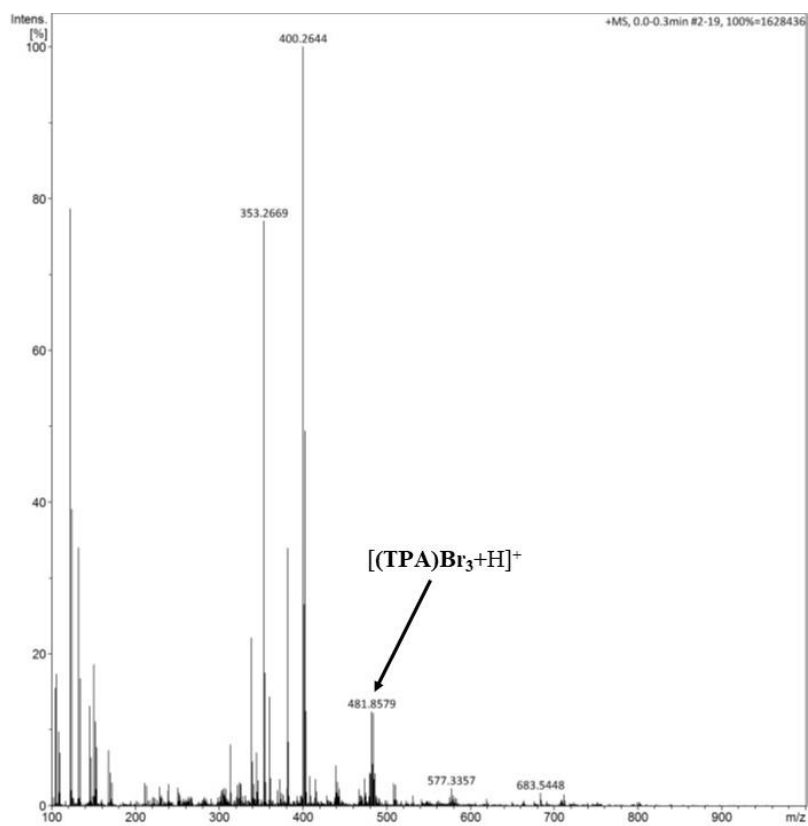

Figure S11. HR-ESI-MS spectra of compound (TPA)Br<sub>3</sub>

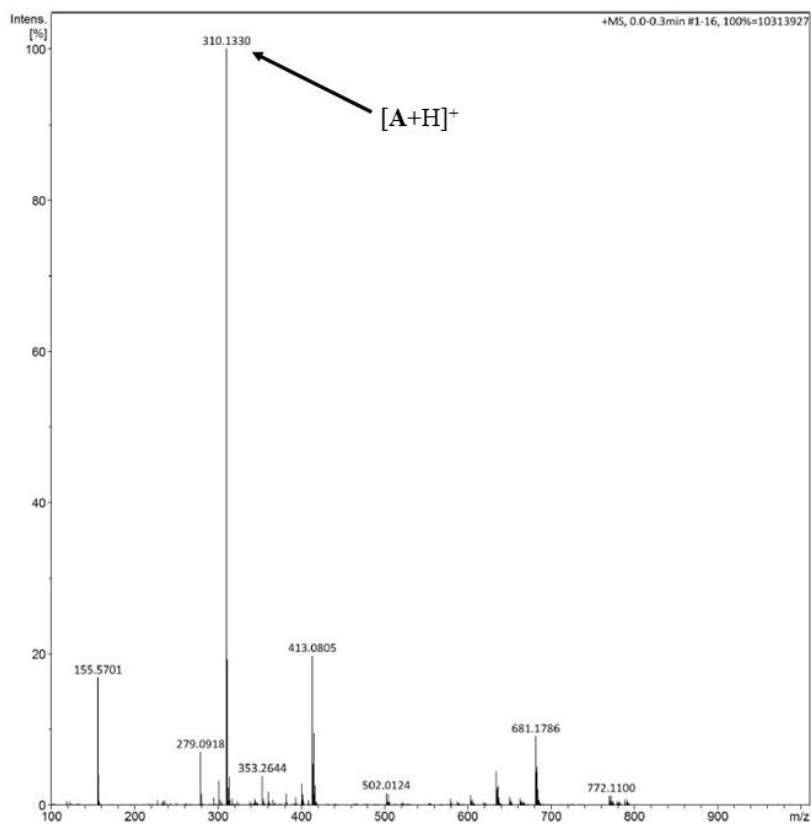

Figure S12. HR-ESI-MS spectra of compound A



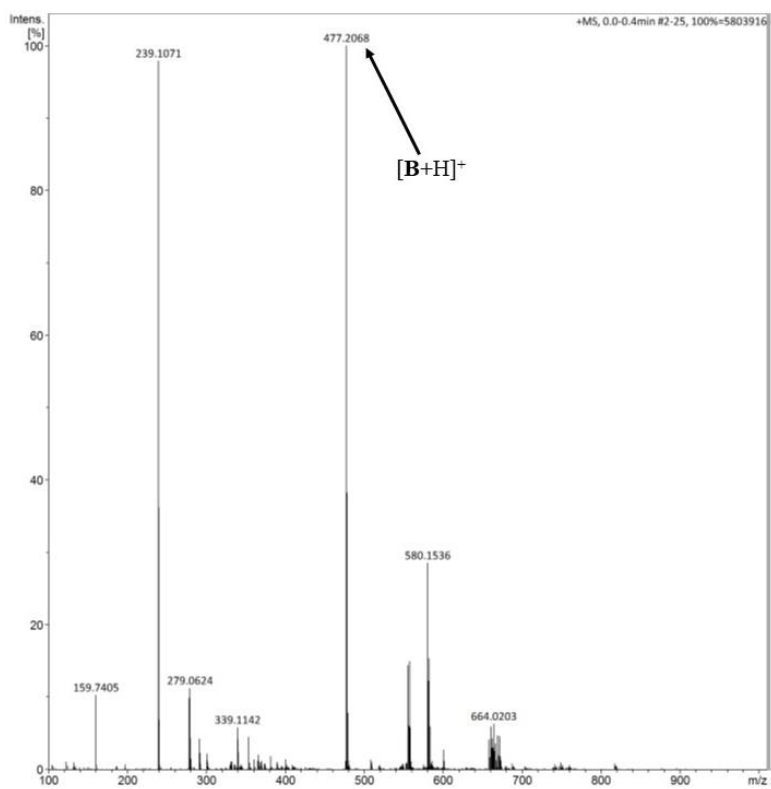

Figure S13. HR-ESI-MS spectra of compound **B**

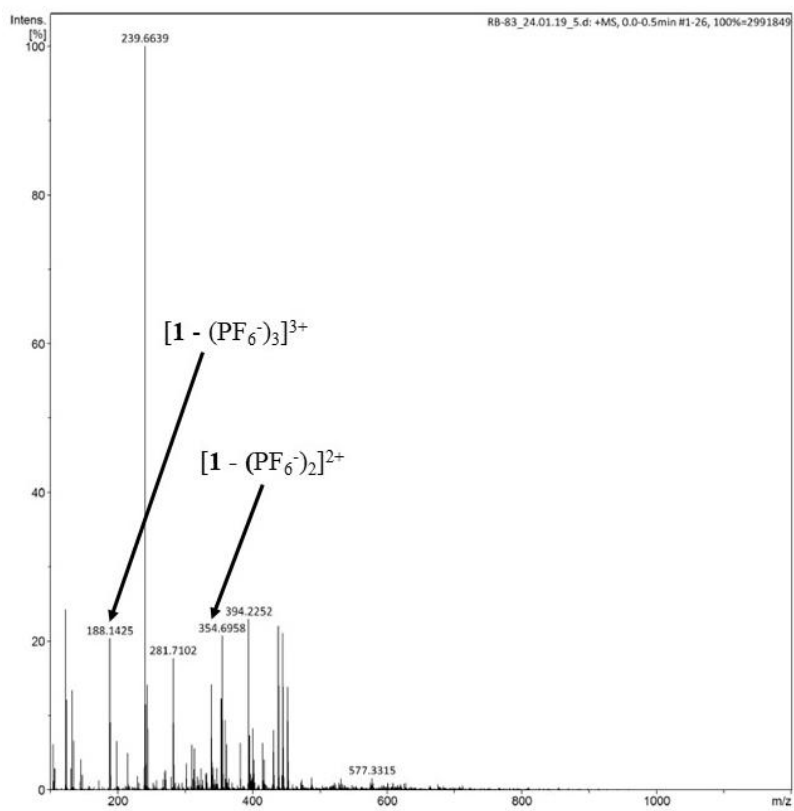

Figure S14. HR-ESI-MS spectra of compound **1**

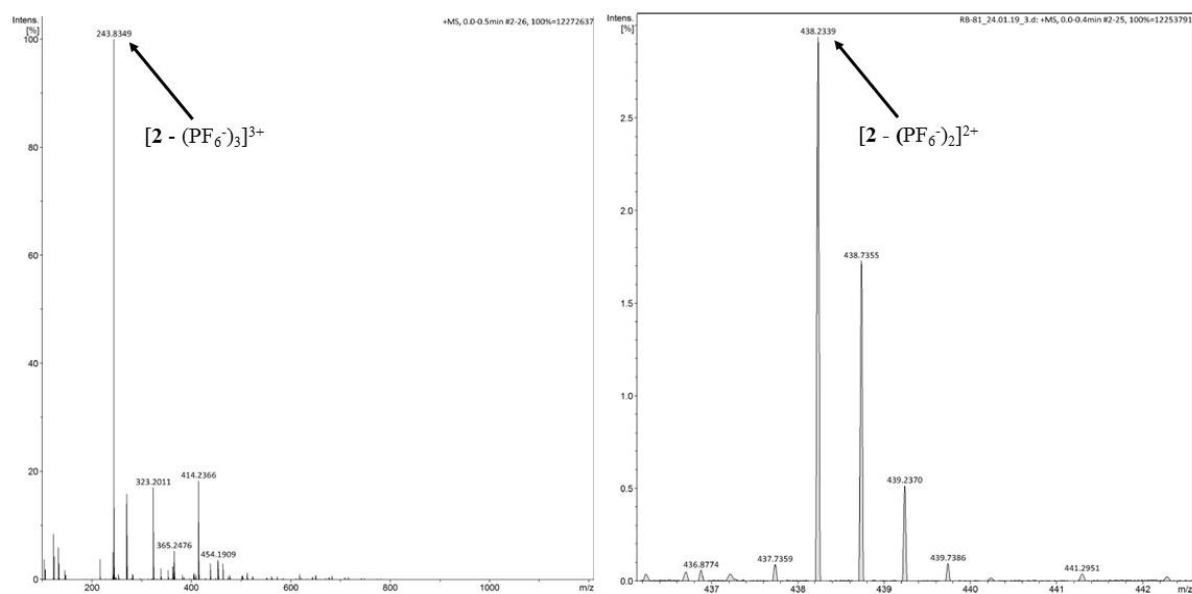

Figure S15. HR-ESI-MS spectra of compound **2**

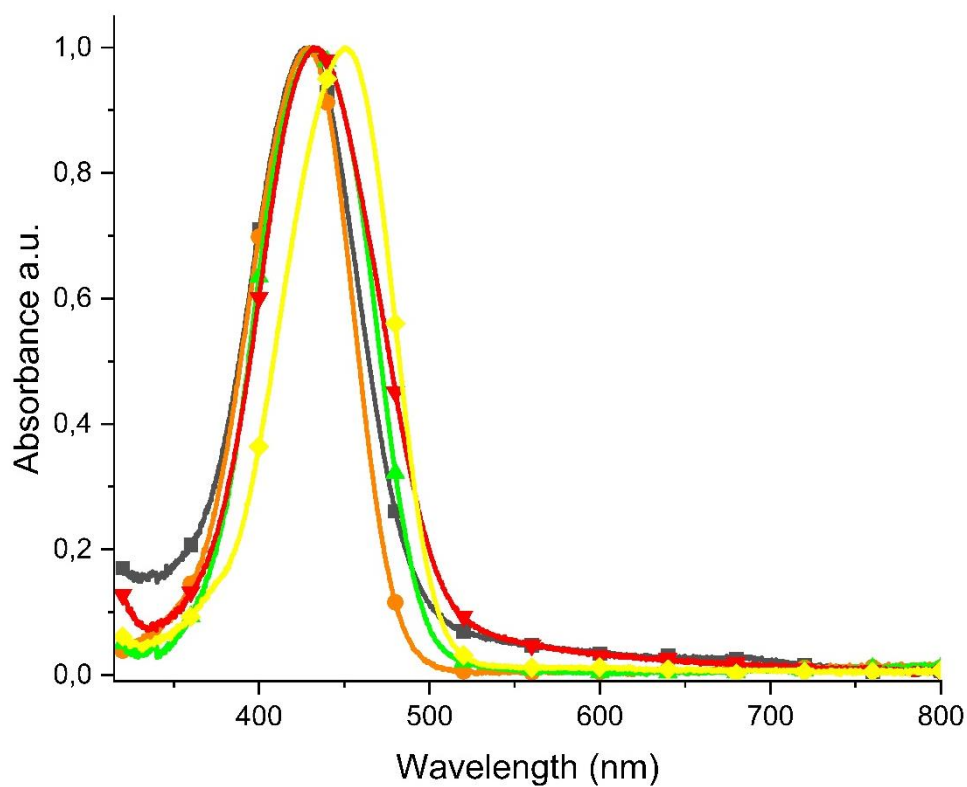

Figure S16. Normalized spectra of **2** in solvents of different polarities: ethyl acetate ( $\blacktriangle$  green), tetrahydrofuran ( $\blacktriangledown$  red), dichloromethane ( $\blacklozenge$  yellow), methanol ( $\bullet$  orange), acetonitrile ( $\blacksquare$  black).
